# Supplementary material for: TTC6-Mediated Stabilization of the Flagellum Annulus Ensures the Rapid and Directed Motion of Sperm
Source: MDPI journal article supplement (doi:10.3390/cells12162091), 2023-08-18
Supplement: s1 [file s1]

# TTC6-mediated stabilization of the flagellum annulus ensures the rapid and directed motion of sperm

## Supplemental Figures

A

| genotype | male # | litters born | litter size1 | litter size2 | litter size3 | litter size4 | litter size5 | litter size6 |
|----------|--------|--------------|--------------|--------------|--------------|--------------|--------------|--------------|
| +/+      | 1      | 6            | 7            | 8            | 8            | 9            | 7            | 7            |
|          | 2      | 6            | 8            | 9            | 5            | 4            | 6            | 6            |
|          | 3      | 6            | 10           | 6            | 5            | 8            | 7            | 7            |
|          | 4      | 6            | 8            | 8            | 3            | 10           | 9            | 8            |
|          | 5      | 6            | 7            | 6            | 8            | 5            | 7            | 7            |
|          | 6      | 6            | 5            | 7            | 10           | 8            | 6            | 9            |
| -/-      | 1      | 1            | 2            |              |              |              |              |              |
|          | 2      | 1            | 1            |              |              |              |              |              |
|          | 3      | 0            |              |              |              |              |              |              |
|          | 4      | 0            |              |              |              |              |              |              |
|          | 5      | 0            |              |              |              |              |              |              |
|          | 6      | 0            |              |              |              |              |              |              |

B

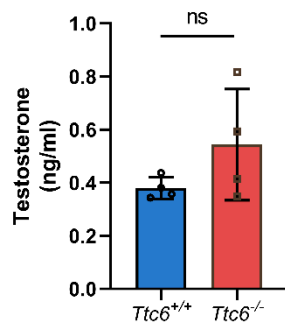

**Supplementary Figure S1.** *Ttc6* knockout leads to male subfertility but unaltered hormone levels. (A) The mating test using wild type female mice coupled with *Ttc6*<sup>+/+</sup> or *Ttc6*<sup>-/-</sup> adult male mice. The number of deliveries for each *Ttc6*<sup>+/+</sup> or *Ttc6*<sup>-/-</sup> adult male mouse is described. Litter size is the number of pups in each delivery. (B) Hormone levels remained unaltered in *Ttc6*<sup>-/-</sup> mice. Estrone, cortisol, progesterone, and testosterone levels were compared between *Ttc6*<sup>+/+</sup> and *Ttc6*<sup>-/-</sup> mice. Data are presented as the mean ± SEM. Two-tailed Student's t-test; ns: no significance.

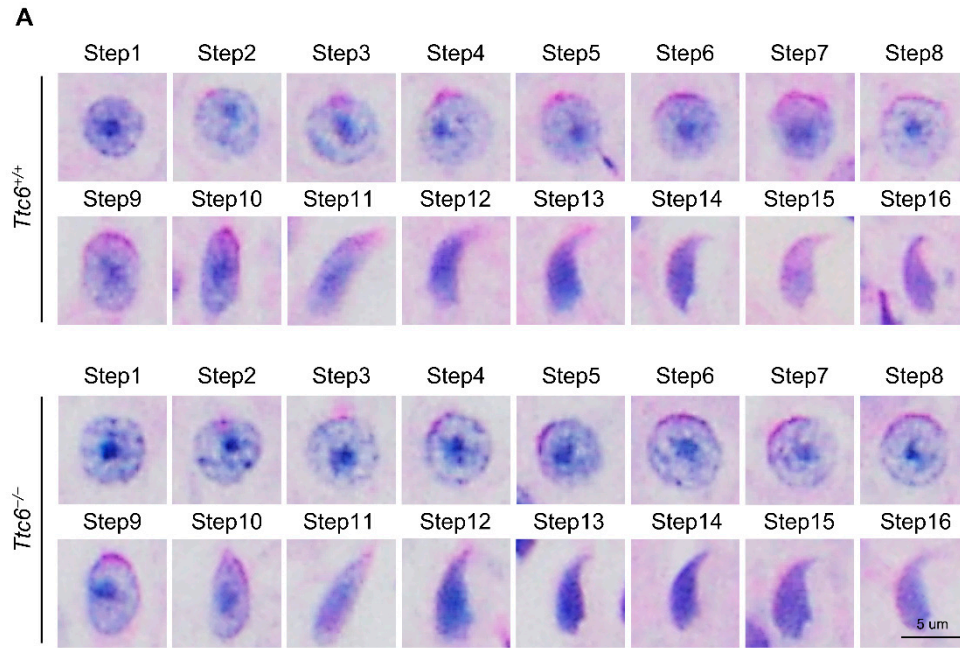

**Supplementary Figure S2. Disruption of *Ttc6* had no effect on acrosome biogenesis.**

(A) Step 1 through Step 16 of spermatogenesis in *Ttc6*<sup>+/+</sup> and *Ttc6*<sup>-/-</sup> testis stained with PAS-hematoxylin. Scale bar, 5 μm.
